# Supplementary material for: Improvement of Pharmacokinetic Profile of TRAIL via Trimer-Tag Enhances its Antitumor Activity in vivo
Source: PubMed Central journal article supplement (PMC5566391; doi:10.1038/s41598-017-09518-1), 2017-08-21
Supplement: 41598_2017_9518_MOESM1_ESM.pdf [file 41598_2017_9518_MOESM1_ESM.pdf]

**Supplementary Information**

**Improvement of Pharmacokinetic Profile of TRAIL via Trimer-Tag  
Enhances its Antitumor Activity *in vivo***

Haipeng Liu, Danmei Su, Jinlong Zhang, Shuaishuai Ge, Youwei Li, Fei Wang,  
Michel Gravel, Anne Roulston, Qing Song, Wei Xu, Joshua G. Liang, Gordon Shore,  
Xiaodong Wang, Peng Liang

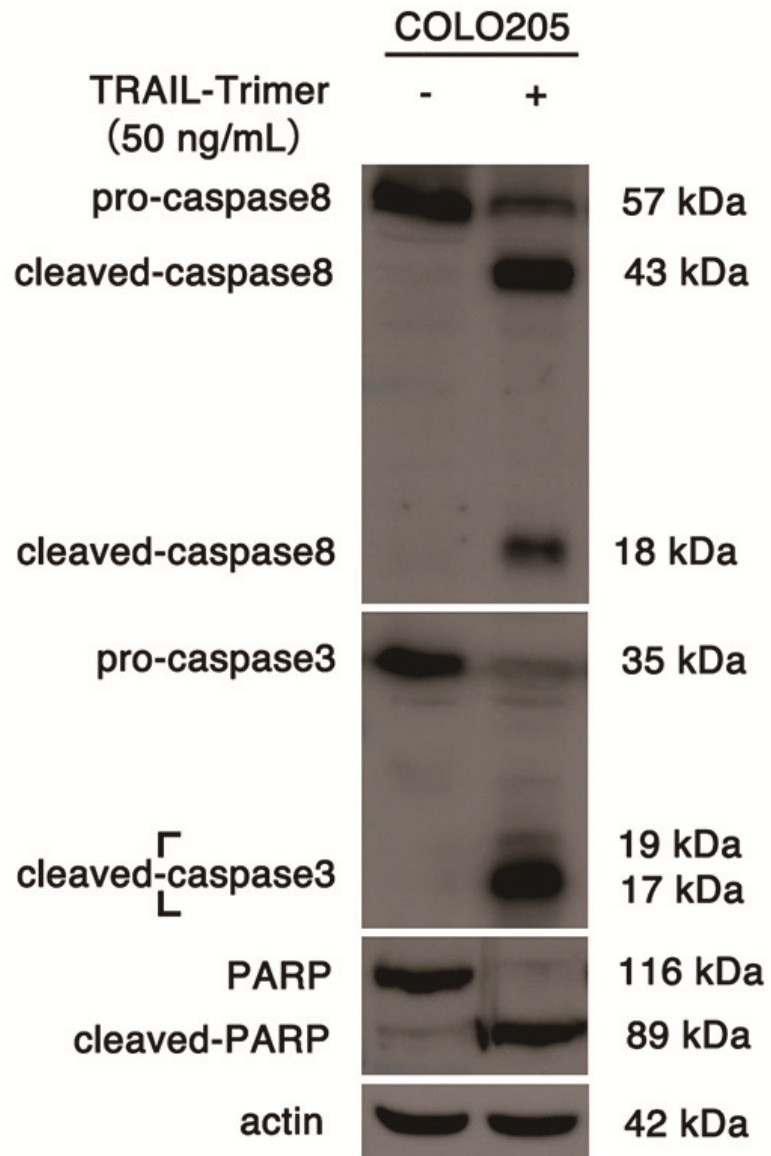

**Supplementary Fig. 1** Western blot analysis of procaspase 8, procaspase 3 and PARP cleavage levels after COLO205 cells were exposed to TRAIL-Trimer in vitro.

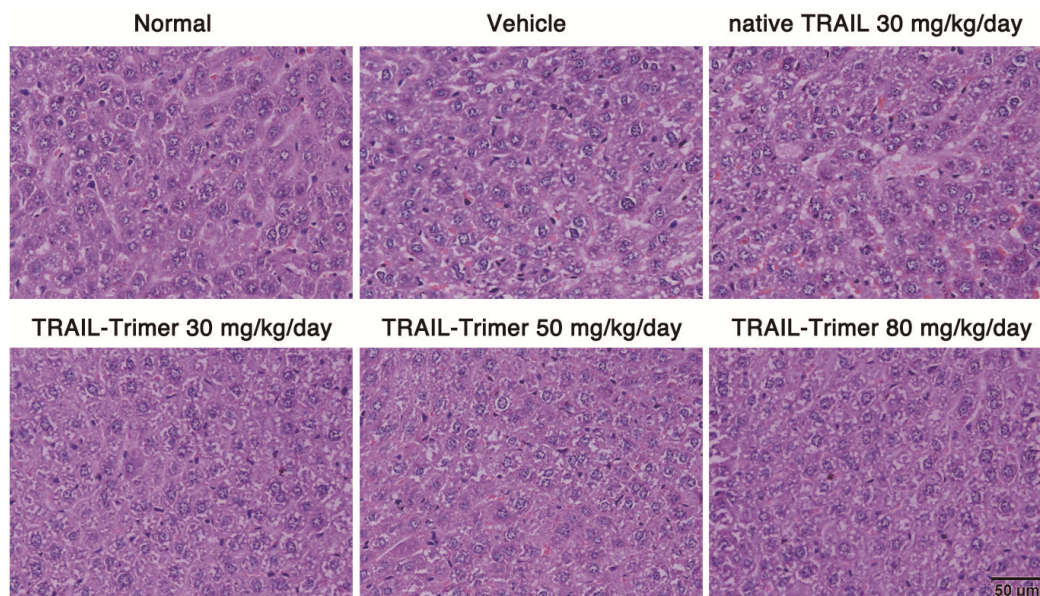

**Supplementary Fig. 2** Hepatotoxicity assessment for TRAIL-Trimer treatment in nude mice using histological detection.

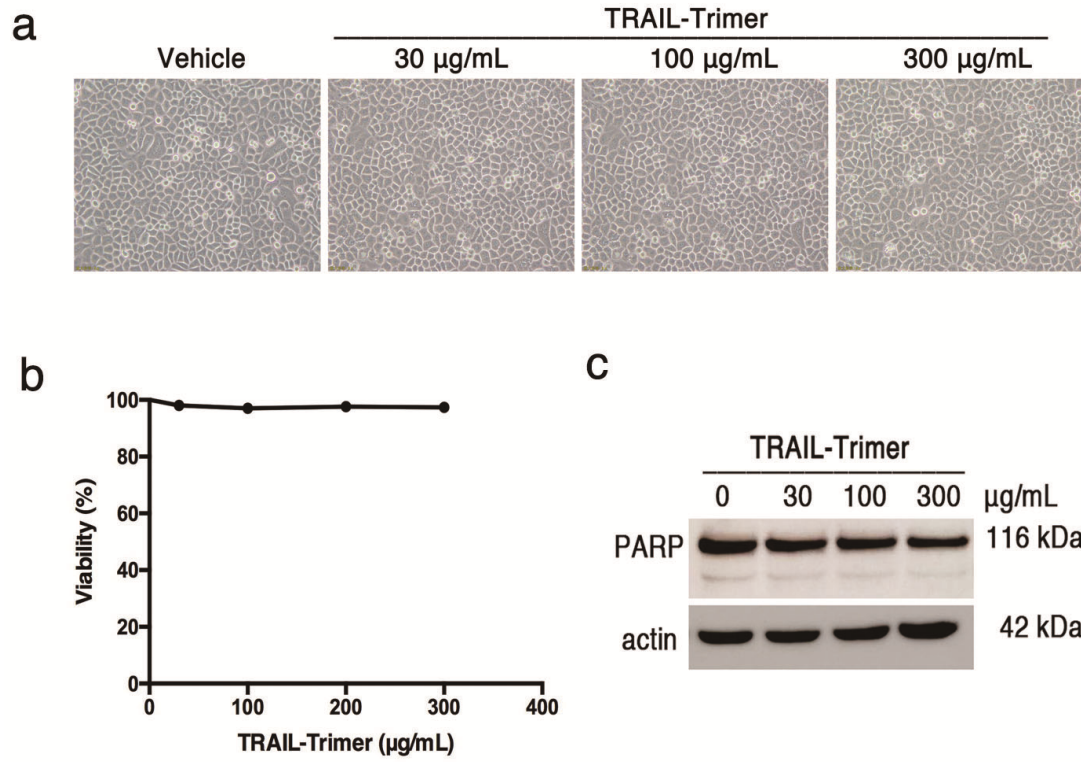

**Supplementary Fig. 3** Evaluation of TRAIL-Trimer hepatotoxicity in human normal liver cells (LO2).

a

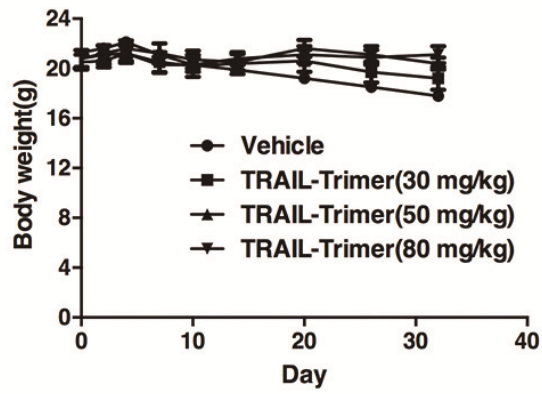

b

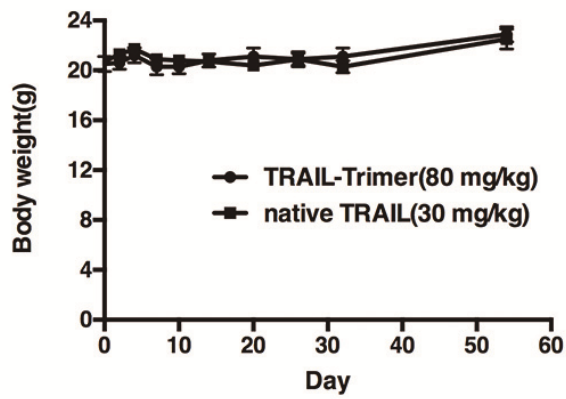

**Supplementary Fig. 4** Body weight of each mouse was measured periodically. Results are expressed as mean  $\pm$  S.D.

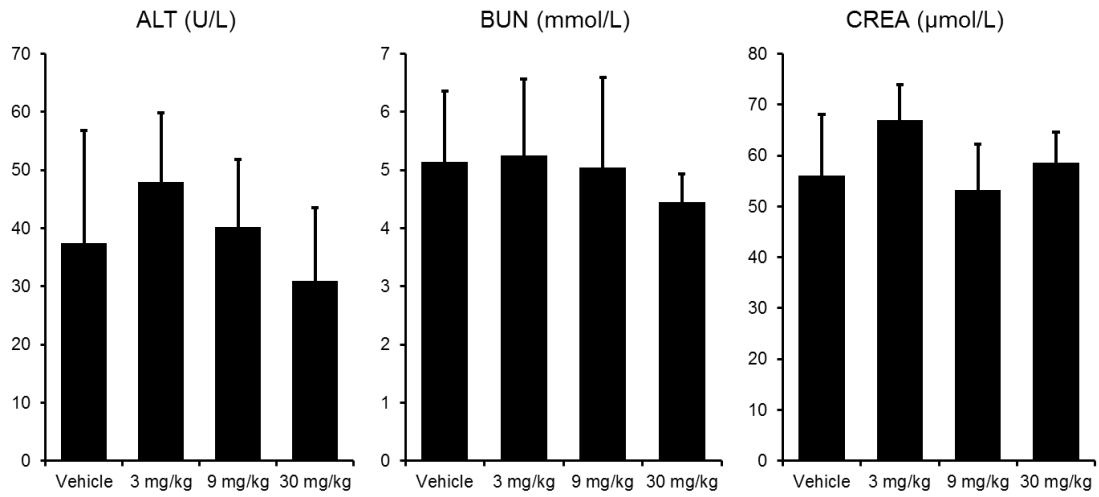

**Supplementary Fig. 5** Alanine aminotransferase (ALT), blood urea nitrogen (BUN) and creatinine (CREA) analyses in monkeys after TRAIL-Trimer administration. Results are expressed as mean  $\pm$  SD (n= 5/group).

**Supplementary Table 1: Routine Blood Tests in Monkeys After TRAIL-Trimer Administration (expressed as mean  $\pm$ SD, n=5/group)**

| Items                             | Vehicle            | 3 mg/kg            | 9 mg/kg            | 30 mg/kg           |
|-----------------------------------|--------------------|--------------------|--------------------|--------------------|
| RBC ( $\times 10^6/\mu\text{L}$ ) | 4.55 $\pm$ 0.26    | 4.37 $\pm$ 0.17    | 4.17 $\pm$ 0.40    | 4.42 $\pm$ 0.32    |
| WBC ( $\times 10^3/\mu\text{L}$ ) | 10.44 $\pm$ 3.00   | 11.11 $\pm$ 3.57   | 14.06 $\pm$ 5.26   | 10.51 $\pm$ 5.12   |
| PLT ( $\times 10^3/\mu\text{L}$ ) | 405.6 $\pm$ 104.94 | 454.60 $\pm$ 85.70 | 364.50 $\pm$ 54.49 | 495.20 $\pm$ 63.01 |
| HGB (g/dL)                        | 10.98 $\pm$ 0.54   | 10.82 $\pm$ 0.91   | 10.00 $\pm$ 0.76   | 10.16 $\pm$ 0.48   |
| HCT (%)                           | 36.92 $\pm$ 2.07   | 35.28 $\pm$ 2.87   | 32.83 $\pm$ 2.07   | 34.68 $\pm$ 2.06   |
| MCH (pg)                          | 24.14 $\pm$ 1.28   | 24.72 $\pm$ 1.33   | 24.00 $\pm$ 0.74   | 23.06 $\pm$ 1.14   |
| MCHC (g/dL)                       | 29.70 $\pm$ 0.85   | 30.60 $\pm$ 0.20   | 30.45 $\pm$ 0.68   | 29.38 $\pm$ 0.55   |
| MCV (fL)                          | 81.30 $\pm$ 5.05   | 80.70 $\pm$ 4.18   | 78.85 $\pm$ 2.91   | 78.50 $\pm$ 3.29   |
